# Supplementary material for: Hypergraph patterns and collaboration structure
Source: Frontiers journal article supplement (doi:10.3389/fphy.2023.1301994), 2024-01-11
Supplement: Data_Sheet_1.PDF [file Data_Sheet_1.PDF]

# Supplementary Material

## 1 ILLUSTRATION OF HYPERGRAPH DEFINITIONS

In Figure S1, we illustrate some of the hypergraph concepts introduced in Section 2.1.

## 2 LABELLED VERSION OF FIGURE 2B

In Figure 2B in the main text, we did not label individual curves. In Figure S2 we split the curves from Figure 2B into 3 different panels and provide curve labels. We use a different naming convention here than we did for 3-patterns in the rest of the manuscript. We do so because the other (less complicated) notation could uniquely describe 1- 2- and 3-patterns, but cannot uniquely map all 4-patterns. The naming convention is described in the caption of Figure S2.

## 3 PROOF OF THEOREM 2.4

**PROOF.** Without loss of generality, let us focus on the pure pattern consisting only of  $k$ -node hyperedges. Let us denote the prevalence of this pattern  $P(X_k)$ . By Eq. (1), the analytical formula for  $P(X_k)$  is,

$$P(X_k) = p_k^{\binom{m}{k}} \prod_{i=k+1}^m (1 - p_i)^{\binom{m}{i}}. \quad (\text{S1})$$

According to Lemma 2.11, for any  $\epsilon > 0$  and large enough  $N$ , we can choose a  $p$  such that all factors in this product are arbitrarily large. All other patterns will either have factors of  $(1 - p_k)$  in the analytical expression, or factors of  $p_l$  in the expression, where  $l \geq k + 1$ . By Lemma 2.11,  $N$  can be chosen large enough to make any such factors arbitrarily close to 0 if  $0 < p_k < 1$ . This proves the theorem.

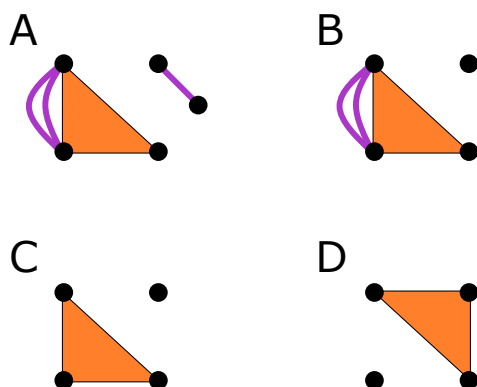

**Figure S1.** Illustration of some concepts introduced in Section 2.1. **A** 5-node hypergraph. **B** Induced subhypergraph of (A) on the 4 left-most nodes. **C** Maximal induced subhypergraph of (A) on 4 left-most nodes. **D** A 4-pattern. (C) happens to be an instance of this 4-pattern in the hypergraph in (A). Labelling nodes  $\{0, 1, 2, 3\}$  starting with the label 0 in the top-left corner and increasing labels by 1 in the clockwise direction, (C) and (D) are also examples of two different labelled 4-patterns.

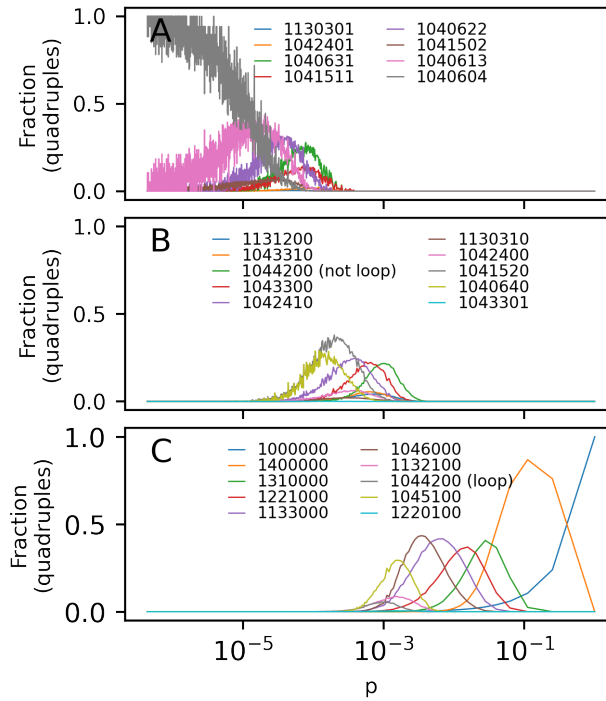

**Figure S2.** Labelled version of Figure 2B split into 3 panels to make plot colors easier to distinguish. The naming convention used for 4-patterns is different than that used for 3-patterns in the rest of the manuscript. The pattern  $1ABCDEF$  has A 3-node hyperedges filled and B not filled, C 2-node hyperedges filled and D not filled, E 1-node hyperedges filled and F not filled. The pattern 1000000 is the 4-pattern consisting of a single 4-node hyperedge. There are 2 possible 4-patterns with the name 1044200 (consisting of 4 2-node hyperedges and all other possible hyperedges missing): one where the hyperedges form a loop and another where they do not. The analytical solutions are not plotted in this figure.

#### 4 PROOF OF LEMMA 2.14

PROOF. By Lemma 2.11, if  $p_k > \frac{1}{2}$ ,  $N$  can be chosen large enough to make the value of  $p_l$  arbitrarily close to 1 for  $l \leq k - 1$ . The prevalence of the pure pattern with  $k$ -node hyperedges is

$$P(X_k) = p_k^{\binom{m}{k}} \Omega, \quad (\text{S2})$$

where  $\Omega = \prod_{i=k+1}^m (1 - p_i)^{\binom{m}{i}}$ . The prevalence of the non-pure patterns containing  $x_k$   $k$ -node and  $x_{k-1}$   $(k - 1)$ -node hyperedges is,

$$P(X'_{k-1,k}) = p_{k-1}^{x_{k-1}} p_k^{x_k} (1 - p_k)^{\binom{m}{k} - x_k} \Omega. \quad (\text{S3})$$

By Lemma 2.11, for any  $\epsilon > 0$  and large enough  $N$ , the first factor in this last expression can get arbitrarily close to 1. In this limit, the pure and non-pure patterns therefore cross when the remaining factors in Eqs. (S2) and (S3) are equal. This happens at when  $p_k = (1 - p_k)$ ; in other words,  $p_k = \frac{1}{2}$ . For any  $p_k > \frac{1}{2}$ ,  $p_k > (1 - p_k)$ . Comparing Eqs. (S2) and (S3), the pure pattern dominates in this case.

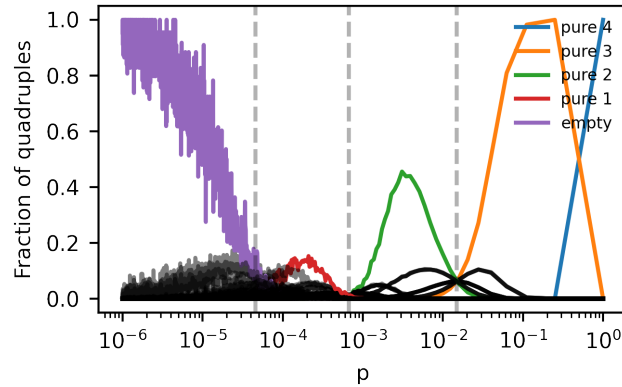

**Figure S3.** Frequency of labelled  $m$ -patterns in the  $G^{(m)}(N, p)$  model with pure  $k$ -node hyperedge patterns in colors. Each datapoint plots the average prevalence of a labelled  $m$ -pattern in 10 simulations of the model for the given  $p$  value and  $m = 4$ ,  $N = 100$ . Vertical gray dashed lines indicate values of  $p$  where  $p_k = 1/2$  for  $1 \leq k \leq 4$ . As argued in the proof of Theorem 2.18, many prevalence curves cross at these values of  $p$ .

## 5 PROOF OF LEMMA 2.15

PROOF. By Lemma 2.11, if  $p_{k+1}$  is non-zero, we can choose  $N$  large enough  $p_l \rightarrow 1$  as  $N \rightarrow \infty$  for  $l \leq k - 1$ . The prevalence of the pure pattern with  $k$ -node hyperedges is

$$P(X_k) = p_k^{\binom{m}{k}} (1 - p_{k+1})^{\binom{m}{k+1}} \Omega', \quad (\text{S4})$$

where  $\Omega' = \prod_{i=k+2}^m (1 - p_i)^{\binom{m}{i}}$ . The prevalence of the non-pure patterns containing  $x_k$   $k$ -node and  $x_{k+1}$   $(k + 1)$ -node hyperedges is,

$$P(X'_{k-1,k}) = p_k^{x_k} p_{k+1}^{x_{k+1}} (1 - p_{k+1})^{\binom{m}{k+1} - x_{k+1}} \Omega'. \quad (\text{S5})$$

By Lemma 2.11, for any  $\epsilon > 0$  and large enough  $N$ , the first factor in both Eqs (S4) and (S5) can get arbitrarily close to 1. Hence, the pure and non-pure patterns above cross when the remaining factors are equal in Eqs (S4) and (S5). This happens when  $p_{k+1} = \frac{1}{2}$ . For lower values of  $p_{k+1}$ ,  $(1 - p_{k+1}) > p_{k+1}$ . This proves the lemma.

## 6 ILLUSTRATION FROM PROOF OF THEOREM 2.18

In the proof of Theorem 2.18, we apply Lemma 2.17. This Lemma states that many prevalence curves cross at values of  $p$  where  $p_k = 1/2$ . In Figure S3, we confirm this by simulations of the  $G^{(m)}(N, p)$  model.

## 7 PROOF OF THEOREM 2.19

PROOF. Let us refer to the patterns as  $X_A$  and  $X_B$ . The prevalence of the patterns can be written down explicitly,

$$P(X_A) = \gamma_A p_{k-1}^{x_k^{(A)}} p_k^{x_k} (1 - p_k)^{\binom{m}{k} - x_k} \Omega, \quad (\text{S6})$$

$$P(X_B) = \gamma_B p_{k-1}^{x_k^{(B)}} p_k^{x_k} (1 - p_k)^{\binom{m}{k} - x_k} \Omega, \quad (\text{S7})$$

where  $\Omega = \prod_{i=k+1}^m (1 - p_i)^{\binom{m}{i}}$  and  $x_j^{(L)}$  is the number of  $j$ -node hyperedges in  $X_L$ . By Lemma 2.11,  $N$  can be chosen large enough to make the  $p_{k-1}$  factor arbitrarily close to 1 for both  $P(X_A)$  and  $P(X_B)$ . Hence, for increasing  $N$ ,

$$\frac{P(X_A)}{P(X_B)} \rightarrow \frac{\gamma_A}{\gamma_B}. \quad (\text{S8})$$

We conclude that the pattern with the smallest combinatorial factor is bound to be less prevalent than the other pattern.
